# Supplementary material
Source: publisher site journal article supplement (https://www.dovepress.com/article/351815)
Supplement: Supplementary file 1 [file get_supplementary_file.php]

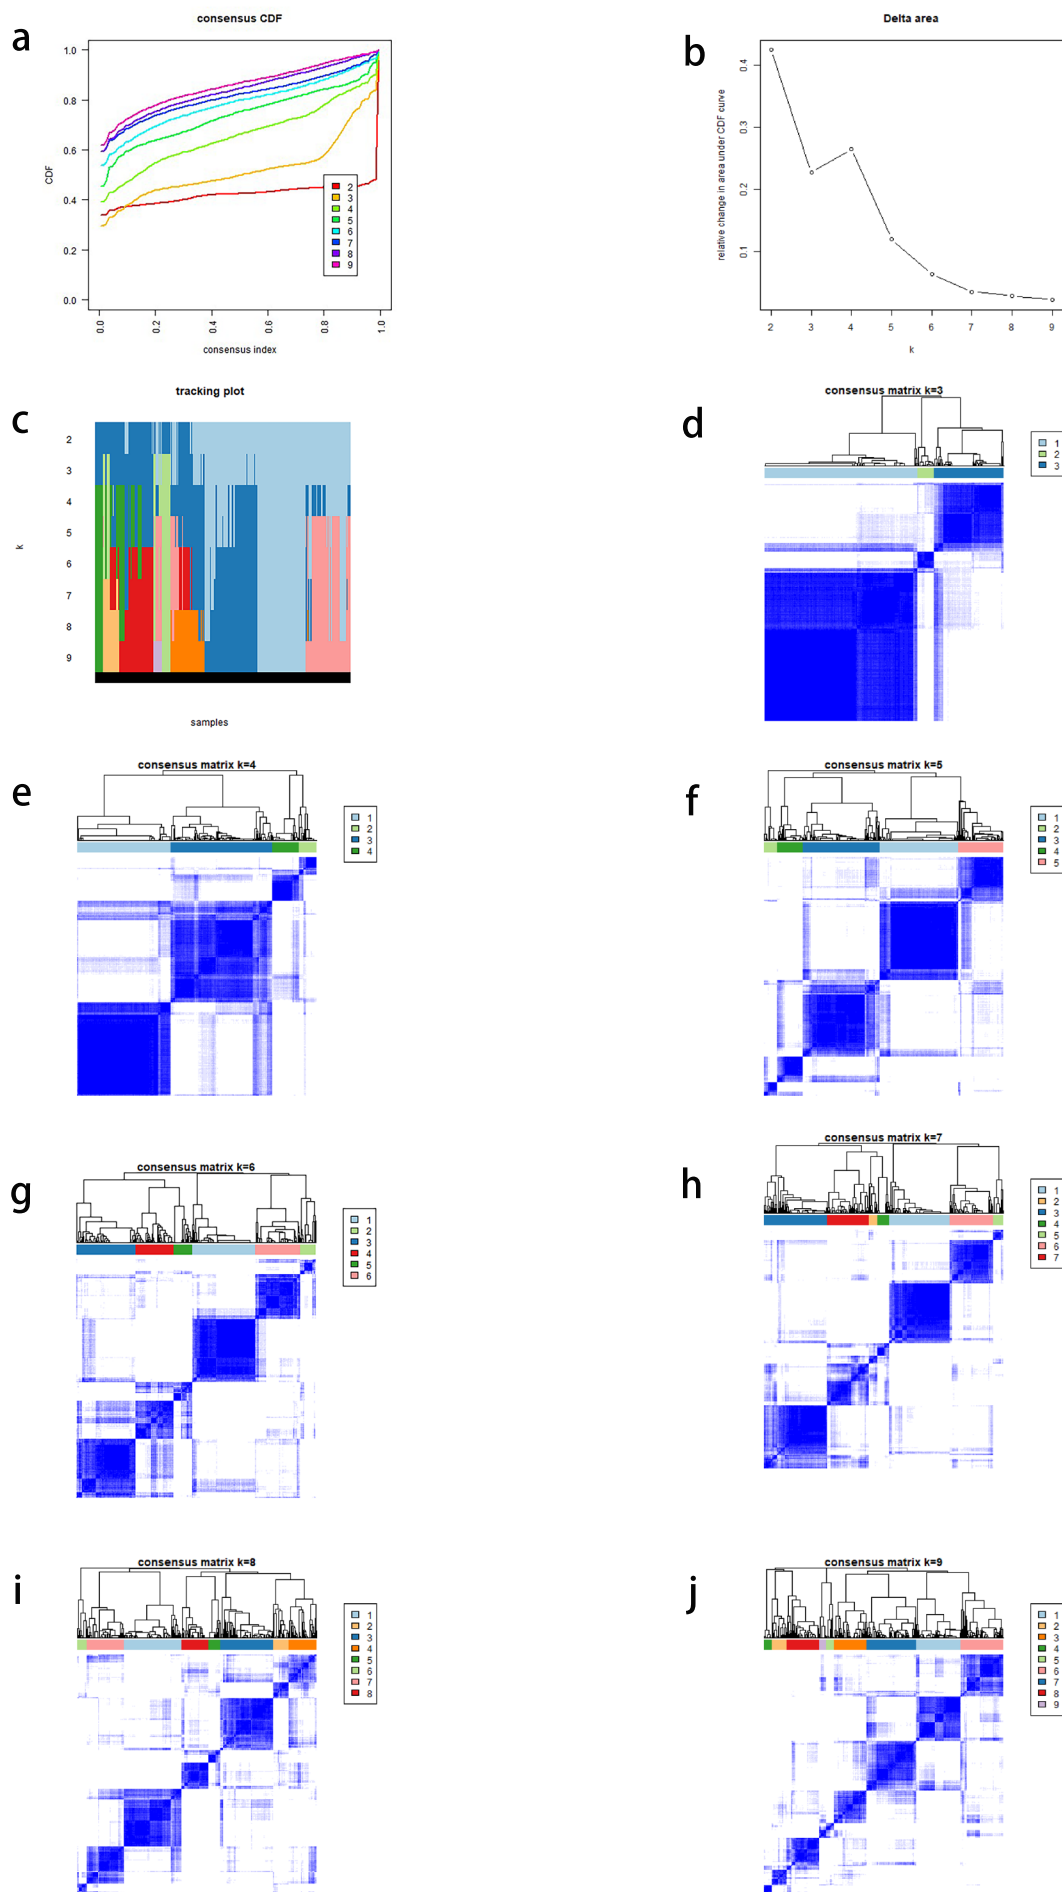

Supplementary Figure 1 Consensus cluster matrix generated by ConsensusClusterPlus R package. (a-c) The cumulative distribution function (CDF) plot, the consensus CDF plots and the heat map of consensus clustering matrix. (d-j) The consensus score matrix of all samples when  $k = 3-9$ .
